# Supplementary material
Source: PubMed Central journal article supplement (PMC5565229)
Supplement: NIHMS893304-supplement-Supplemental_material.pdf [file NIHMS893304-supplement-Supplemental_material.pdf]

**The Electronic Supplementary Material file includes Abbreviations, eight Tables, and three Figures.**

**Title: Deficits in task-set maintenance and execution networks in Parkinson's disease**

**Authors:** Sule Tinaz<sup>1</sup>, Peter Lauro<sup>2</sup>, Mark Hallett<sup>1</sup>, and Silvina G. Horovitz<sup>1</sup>

(1) Human Motor Control Section, National Institute of Neurological Disorders and Stroke, National Institutes of Health, Bethesda, MD, 20892, USA.

(2) Office of the Clinical Director, National Institute of Neurological Disorders and Stroke, National Institutes of Health, Bethesda, MD, 20892, USA.

Corresponding Author: Sule Tinaz

Email: [aysesule.tinaz@nih.gov](mailto:aysesule.tinaz@nih.gov)

Address: 10 Center Drive MSC 1428

Building 10, Room 7D42

Bethesda, MD 20892

Phone: 301-402-0703

Fax: 301-480-2286

Email addresses of co-authors:

[peter.lauro@nih.gov](mailto:peter.lauro@nih.gov)

[hallettm@ninds.nih.gov](mailto:hallettm@ninds.nih.gov)

[silvina.horovitz@nih.gov](mailto:silvina.horovitz@nih.gov)

## **Abbreviations:**

BA: Brodmann area  
BC: Betweenness centrality  
B/l: Bilateral  
CC: Clustering coefficient  
dAI: Dorsal anterior insula  
FG: Frontal gyrus  
HV: Healthy volunteer  
H & Y: Hoehn and Yahr  
IFG: Inferior frontal gyrus  
ITG: Inferior temporal gyrus  
L: Left  
LE: Local efficiency  
MFG: Middle frontal gyrus  
MidCG: Mid cingulate gyrus  
MNI: Montreal Neurological Institute  
MTG: Middle temporal gyrus  
NS: Node strength  
OFI: Orbitofrontal insula  
op: Operculum  
Op: Opercularis  
Orb: Orbicularis  
PD: Parkinson's disease patients  
PFC: Prefrontal cortex  
postCG: Postcentral gyrus  
preCG: Precentral gyrus  
R: Right  
SFG: Superior frontal gyrus  
SMA: Supplementary motor area  
SMG: Supramarginal gyrus  
STG: Superior temporal gyrus  
TPJ: Temporoparietal junction  
Tri: Triangularis  
sup med: Superior medial  
UPDRS total: Unified Parkinson's disease rating scale total score  
UPDRS III: UPDRS motor examination score

**Table 1 Anatomical labels and MNI coordinates of nodes<sup>1</sup>**

|                                    | <b>x</b> | <b>y</b> | <b>z</b> |
|------------------------------------|----------|----------|----------|
| <b>Cingulo-opercular Network</b>   |          |          |          |
| R anterior PFC                     | 27       | 49       | 26       |
| R ventral PFC                      | 34       | 32       | 7        |
| L anterior cingulate cortex        | -2       | 30       | 27       |
| R ventral frontal cortex           | 51       | 23       | 8        |
| R anterior insula                  | 38       | 21       | -1       |
| R dorsal anterior cingulate cortex | 9        | 20       | 34       |
| L anterior insula                  | -36      | 18       | 2        |
| L dorsal cingulate cortex          | -6       | 17       | 34       |
| Medial frontal cortex              | 0        | 15       | 45       |
| L basal ganglia                    | -20      | 6        | 7        |
| R basal ganglia                    | 14       | 6        | 7        |
| L ventral frontal cortex           | -48      | 6        | 1        |
| R mid insula                       | 37       | -2       | -3       |
| L thalamus                         | -12      | -3       | 13       |
| L thalamus                         | -12      | -12      | 6        |
| R thalamus                         | 11       | -12      | 6        |
| R mid insula                       | 32       | -12      | 2        |
| L mid insula                       | -30      | -14      | 1        |
| R basal ganglia                    | 11       | -24      | 2        |
| L posterior insula                 | -30      | -28      | 9        |
| R temporal                         | 51       | -30      | 5        |
| L posterior cingulate              | -4       | -31      | -4       |
| R fusiform                         | 54       | -31      | -18      |
| R precuneus                        | 8        | -40      | 50       |
| R parietal                         | 58       | -41      | 20       |
| R temporal                         | 43       | -43      | 8        |
| L parietal                         | -55      | -44      | 30       |
| R superior temporal                | 42       | -46      | 21       |
| L angular gyrus                    | -41      | -47      | 29       |
| L temporal                         | -59      | -47      | 11       |
| L temporoparietal junction         | -52      | -63      | 15       |
| <b>Frontoparietal Network</b>      |          |          |          |
| R anterior PFC                     | 29       | 57       | 18       |
| L anterior PFC                     | -29      | 57       | 10       |
| R ventral anterior PFC             | 42       | 48       | -3       |
| L ventral anterior PFC             | -43      | 47       | 2        |
| R ventrolateral PFC                | 39       | 42       | 16       |
| R dorsolateral PFC                 | 40       | 36       | 29       |
| L anterior cingulate cortex        | -1       | 28       | 40       |
| R dorsolateral PFC                 | 46       | 28       | 31       |
| L ventral PFC                      | -52      | 28       | 17       |

|                            |     |     |    |
|----------------------------|-----|-----|----|
| L dorsolateral PFC         | -44 | 27  | 33 |
| R dorsal frontal cortex    | 40  | 17  | 40 |
| R dorsal frontal cortex    | 44  | 8   | 34 |
| L dorsal frontal cortex    | -42 | 7   | 36 |
| L inferior parietal lobule | -41 | -40 | 42 |
| R inferior parietal lobule | 54  | -44 | 43 |
| L posterior parietal       | -35 | -46 | 48 |
| L inferior parietal lobule | -48 | -47 | 49 |
| L inferior parietal lobule | -53 | -50 | 39 |
| R inferior parietal lobule | 44  | -52 | 47 |
| L intraparietal sulcus     | -32 | -58 | 46 |
| R intraparietal sulcus     | 32  | -59 | 41 |

### **Sensorimotor Network**

|                          |     |     |    |
|--------------------------|-----|-----|----|
| R frontal                | 58  | 11  | 14 |
| R dorsal frontal cortex  | 60  | 8   | 34 |
| L ventral frontal cortex | -55 | 7   | 23 |
| R pre-SMA                | 10  | 5   | 51 |
| R ventral frontal cortex | 43  | 1   | 12 |
| SMA                      | 0   | -1  | 52 |
| R frontal                | 53  | -3  | 32 |
| R precentral gyrus       | 58  | -3  | 17 |
| L mid insula             | -42 | -3  | 17 |
| L precentral gyrus       | -44 | -6  | 49 |
| L parietal               | -26 | -8  | 54 |
| R precentral gyrus       | 48  | -8  | 24 |
| L precentral gyrus       | -54 | -9  | 23 |
| R precentral gyrus       | 44  | -11 | 38 |
| L parietal               | -47 | -12 | 36 |
| R mid insula             | 33  | -12 | 16 |
| L mid insula             | -36 | -12 | 15 |
| R temporal               | 59  | -13 | 8  |
| L parietal               | -38 | -15 | 59 |
| L parietal               | -47 | -18 | 50 |
| R parietal               | 46  | -20 | 45 |
| L parietal               | -55 | -22 | 38 |
| L precentral gyrus       | -54 | -22 | 22 |
| L temporal               | -54 | -22 | 9  |
| R parietal               | 41  | -23 | 55 |
| R posterior insula       | 42  | -24 | 17 |
| R parietal               | 18  | -27 | 62 |
| L parietal               | -38 | -27 | 60 |
| L parietal               | -24 | -30 | 64 |
| L posterior parietal     | -41 | -31 | 48 |
| L temporal               | -41 | -37 | 16 |
| L temporal               | -53 | -37 | 13 |

### Skewness Calculations of the Unthresholded Node Strength Distributions

The histograms of the unthresholded node strength values for both groups are shown in Fig. 1 (black bars: HV, white bars: PD). The distributions were skewed for both groups.

**Fig. 1 Histograms**

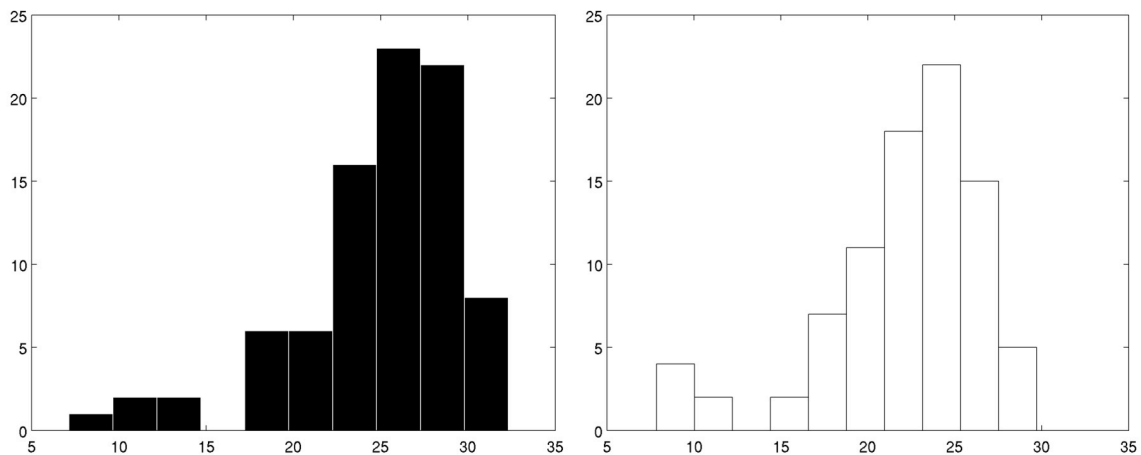

Using the skewness function in Matlab 2013a, we also established quantitatively using a bootstrapping method that the skewness was not significantly different between the groups. To do so, the average unthresholded node strength values of 86 nodes were calculated for each group yielding a an 86 x 1 vector per group. Then, the skewness of each group vector was calculated and the absolute difference between the skewness values (observed difference) was computed. Subsequently, the data were randomly sorted into two group vectors (1000 permutations) and the absolute difference between the skewness values was calculated for each permutation (randomized difference). Whenever the randomized difference was greater than the observed, this was counted as a “hit.” In the end, a p value was determined as a hits/permutations ratio. All of the randomized differences were sorted along an x-axis, and the value corresponding to the 95% confidence interval threshold was identified. The observed skewness difference (0.096) was much smaller than the value corresponding to the 95% threshold (0.6); therefore, it was insignificant (Fig. 2).

**Fig. 2 Plots**

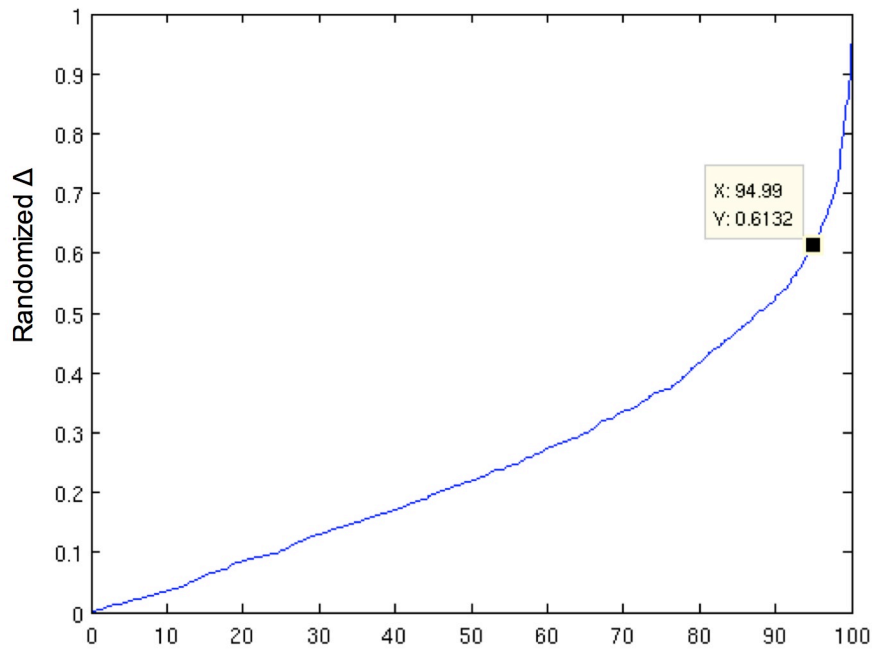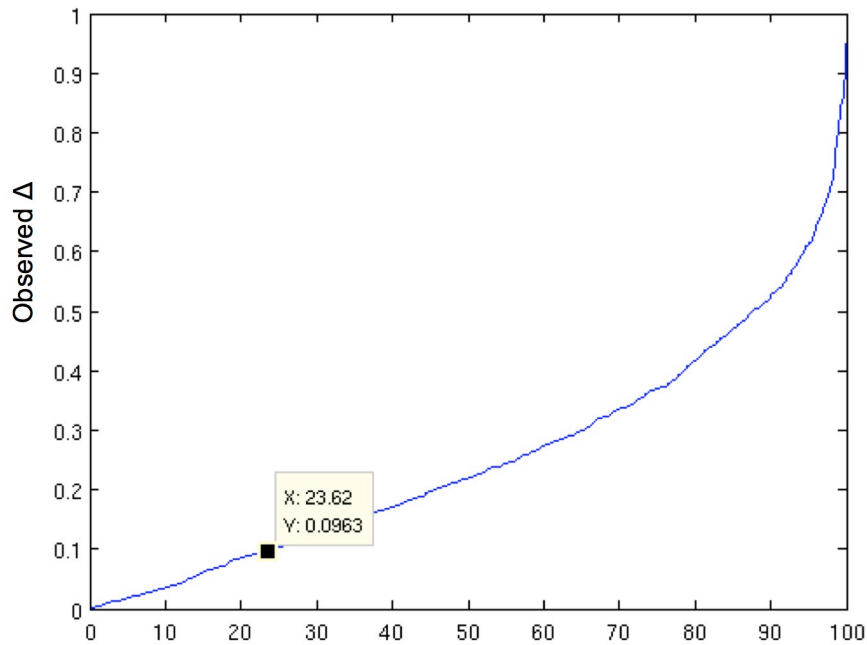

The top plot shows the randomized differences sorted along the x-axis by size after bootstrapping. The 95% threshold corresponds to a difference of 0.6. The bottom plot demonstrates the position of the actual observed difference on the curve, which corresponds to a threshold of 23%.

**Table 2 Demographic and clinical data of patients in “OFF” state**

| <b>ID</b> | <b>Age</b> | <b>H &amp; Y</b> | <b>UPDRS total</b> | <b>UPDRS III</b> |
|-----------|------------|------------------|--------------------|------------------|
| PD1       | 68.5       | 2.5              | 61                 | 41               |
| PD2       | 59.6       | 3                | 78                 | 52               |
| PD3       | 59         | 2.5              | 54                 | 35               |
| PD4       | 68.6       | 2.5              | 68                 | 53               |
| PD5       | 64.6       | 2                | 38                 | 32               |
| PD6       | 46.5       | 2                | 48                 | 33               |
| PD7       | 75.6       | 3                | 38                 | 26               |
| PD8       | 67.7       | 2                | 36                 | 28               |
| PD9       | 73.2       | 2.5              | 62                 | 46               |
| PD10      | 62         | 2.5              | 50                 | 31               |
| PD11      | 73         | 2.5              | 36                 | 26               |
| PD12      | 69         | 2.5              | 63                 | 39               |
| PD13      | 59         | 3                | 58                 | 38               |
| PD14      | 61         | 2.5              | 47                 | 34               |
| PD15      | 54.8       | 2.5              | 45                 | 32               |
| PD16      | 54         | 2                | 51                 | 31               |
| PD17      | 59.4       | 2.5              | 65                 | 35               |
| PD18      | 64         | 2                | 32                 | 14               |
| PD19      | 50.3       | 3                | 60                 | 23               |
| PD20      | 68         | 2                | 31                 | 21               |
| PD21      | 42         | 3                | 54                 | 22               |

|      |      |     |    |    |
|------|------|-----|----|----|
| PD22 | 61   | 3   | 62 | 25 |
| PD23 | 65.6 | 2   | 19 | 7  |
| PD24 | 66.6 | 2.5 | 33 | 21 |
| PD25 | 64.3 | 2   | 25 | 6  |
| PD26 | 61.6 | 3   | 53 | 29 |
| PD27 | 55.8 | 2.5 | 28 | 16 |
| PD28 | 62.4 | 2   | 35 | 22 |
| PD29 | 43   | 2   | 20 | 10 |
| PD30 | 54.8 | 2   | 45 | 24 |

---

**Table 3 Left dAI within-group functional connectivity**

| <b>HV</b>           | <b>BA</b> | <b>x</b> | <b>y</b> | <b>z</b> | <b># of voxels</b> |
|---------------------|-----------|----------|----------|----------|--------------------|
| L OFI               | 47/12     | -42      | 19       | -4       | 706                |
| R OFI               | 47/12     | 31       | 23       | -7       | 563                |
| L midCG             | 32        | -4       | 9        | 42       | 509                |
| R SMG               | 40        | 63       | -37      | 35       | 71                 |
| R midCG/paracentral | 31        | 7        | -33      | 49       | 18                 |
| L midCG/precuneus   | 5         | -11      | -39      | 50       | 13                 |
| R STG/SMG           | 42/40     | 66       | -30      | 21       | 12                 |
| L IFG (pars Tri)    | 45        | -42      | 26       | 24       | 12                 |
| R MFG               | 9         | 38       | 44       | 28       | 12                 |
| R precuneus         | 7         | 21       | -61      | 28       | 10                 |
| L putamen           |           | -25      | 5        | -7       | 7                  |
| L MFG               | 46        | -42      | 40       | 31       | 7                  |
| R MFG               | 10        | 35       | 44       | 7        | 5                  |
| R calcarine         | 17        | 17       | -68      | 10       | 4                  |
| R calcarine         | 17        | 21       | -65      | 7        | 2                  |
| L calcarine         | 17        | -14      | -72      | 14       | 2                  |
| R Rolandic op       | 44        | 59       | 2        | 14       | 2                  |
| L cuneus/calcarine  | 17        | -14      | -68      | 21       | 2                  |
| R midCG             | 23        | 3        | -23      | 31       | 2                  |
| L midCG             | 24        | -7       | -9       | 38       | 2                  |
| R precuneus         | 7         | 10       | -68      | 52       | 2                  |



| <b>PD</b>           | <b>BA</b> | <b>x</b> | <b>y</b> | <b>z</b> | <b># of voxels</b> |
|---------------------|-----------|----------|----------|----------|--------------------|
| R Rolandic op/IFG   | 44/45     | 56       | 12       | 0        | 763                |
| L insula/IFG        | 47/13     | -32      | 19       | 0        | 682                |
| L SMA/midCG         | 6/32      | 3        | 9        | 49       | 410                |
| L MFG               | 46        | -42      | 40       | 21       | 75                 |
| R midCG             | 23        | 7        | -23      | 28       | 15                 |
| R midCG/paracentral | 31/6      | 10       | -30      | 45       | 9                  |
| R precuneus         | 7         | 21       | -68      | 42       | 4                  |
| R thalamus          |           | 17       | -12      | 10       | 3                  |
| L SMG               | 40        | -63      | -26      | 42       | 2                  |

Top 5% of correlations are shown. Cutoff for HV is  $Z = 6.27$  and for patients  $Z = 6.12$ .

**Table 4 Left TPJ within-group functional connectivity**

| <b>HV</b>               | <b>BA</b> | <b>x</b> | <b>y</b> | <b>z</b> | <b># of voxels</b> |
|-------------------------|-----------|----------|----------|----------|--------------------|
| L TPJ                   |           | -56      | -68      | 10       | 626                |
| R TPJ                   |           | 52       | -54      | 17       | 515                |
| R precuneus             | 31        | 7        | -61      | 21       | 272                |
| R IFG (pars Orb)        | 47        | 42       | 30       | -14      | 156                |
| L IFG/Insula (pars Tri) | 47/13     | -42      | 26       | 7        | 138                |
| L calcarine             | 18        | -21      | -61      | 10       | 70                 |
| L MTG                   | 21        | -53      | -19      | -4       | 43                 |
| R sup med FG            | 9         | 3        | 47       | 35       | 27                 |
| L sup med FG            | 9         | -7       | 47       | 21       | 25                 |
| R MFG/preCG             | 6         | 45       | -5       | 52       | 21                 |
| L ITG/fusiform          | 37        | -46      | -40      | -25      | 18                 |
| R SFG                   | 9         | 14       | 58       | 28       | 16                 |
| R insula                | 13        | 49       | 2        | 0        | 12                 |
| R Rolandic op/insula    | 13        | 45       | -12      | 17       | 11                 |
| R lingual               | 17        | 17       | -61      | 0        | 10                 |
| L preCG                 | 6         | -39      | -2       | 45       | 10                 |
| R STG                   | 22        | 63       | -12      | 3        | 5                  |
| R MTG                   | 21        | 52       | -9       | -18      | 4                  |
| R STG                   | 22        | 56       | 5        | -14      | 4                  |
| R paracentral           | 4         | 3        | -40      | 70       | 4                  |
| L hippocampus           |           | -21      | -30      | -4       | 3                  |
| R temporal pole         | 38        | 63       | 12       | 0        | 3                  |
| L IFG                   | 45        | -49      | 26       | 17       | 3                  |
| R IFG (pars Tri)        | 45        | 38       | 16       | 28       | 3                  |

|                  |    |    |     |     |   |
|------------------|----|----|-----|-----|---|
| R postCG         | 2  | 59 | -16 | 35  | 3 |
| R fusiform       | 37 | 42 | -44 | -21 | 2 |
| R IFG (pars Orb) | 47 | 24 | 23  | -18 | 2 |
| R lingual        |    | 10 | -51 | -4  | 2 |
| R insula         | 13 | 35 | -16 | 7   | 2 |
| R insula         | 13 | 38 | -12 | 7   | 2 |
| R midCG          | 24 | 7  | -2  | 45  | 2 |
| R SMA            | 6  | 10 | -5  | 52  | 2 |

| <b>PD</b>              | <b>BA</b> | <b>x</b> | <b>y</b> | <b>z</b> | <b># of voxels</b> |
|------------------------|-----------|----------|----------|----------|--------------------|
| B/l calcarine          | 18        | 14       | -61      | 17       | 464                |
| B/l sup med FG         | 8         | -7       | 33       | 52       | 453                |
| L TPJ                  |           | -53      | -68      | 10       | 452                |
| R TPJ                  |           | 49       | -65      | 17       | 298                |
| L midCG/precuneus      | 5         | -7       | -40      | 49       | 157                |
| L SFG                  | 10        | -18      | 61       | 28       | 34                 |
| R IFG (pars Tri)       | 45        | 56       | 30       | 17       | 29                 |
| L MTG                  | 21        | -60      | -12      | -11      | 12                 |
| R MTG                  | 21        | 70       | -33      | -4       | 11                 |
| R ITG/MTG              | 21        | 52       | 2        | -35      | 10                 |
| L sup med FG           | 10        | -0       | 65       | 17       | 10                 |
| L MTG                  | 21        | -70      | -44      | 3        | 9                  |
| L preCG                | 6         | -39      | -2       | 52       | 9                  |
| L IFG (pars Op)        | 44        | -53      | 16       | 35       | 7                  |
| L paracentral          | 4         | -7       | -40      | 77       | 7                  |
| R IFG (pars Orb)       | 47        | 45       | 30       | -14      | 6                  |
| R hippocampus          |           | 21       | -33      | -4       | 6                  |
| R IFG (pars Op)        | 44        | 45       | 16       | 35       | 6                  |
| L parahippocampus      | 36        | -28      | -26      | -18      | 5                  |
| L parahippocampus      | 36        | -28      | -33      | -11      | 5                  |
| L IFG (pars Orb)       | 47        | -56      | 26       | -7       | 5                  |
| L olfactory            |           | -0       | 16       | -11      | 4                  |
| L postCG               | 3         | -39      | -16      | 38       | 4                  |
| R preCG                | 6         | 49       | 5        | 42       | 4                  |
| L medial temporal pole | 38        | -49      | 19       | -28      | 3                  |
| R MTG                  | 21        | 56       | -5       | -18      | 3                  |
| L fusiform             | 37        | -32      | -40      | -14      | 3                  |
| R MTG                  | 21        | 56       | -19      | -7       | 3                  |
| R SFG                  | 10        | 31       | 58       | 14       | 3                  |
| L medial temporal pole | 38        | 49       | 9        | -28      | 2                  |
| R SFG                  | 10        | 17       | 58       | 24       | 2                  |
| R postCG               | 3         | 52       | -16      | 52       | 2                  |
| R precuneus            | 7         | 3        | -51      | 63       | 2                  |

Top 5% of correlations are shown. Cutoff for HV is  $Z = 5.69$  and for patients,  $Z = 5.58$ .

**Table 5 Right preCG1 functional connectivity**

| <b>HV</b>            | <b>BA</b> | <b>x</b> | <b>y</b> | <b>z</b> | <b># of voxels</b> |
|----------------------|-----------|----------|----------|----------|--------------------|
| B/l preCG and SMA    | 4/6       | -28      | -30      | 59       | 1913               |
| R calcarine gyrus    | 18        | 17       | -61      | 17       | 40                 |
| L lingual            | 18        | -11      | -65      | -4       | 11                 |
| R putamen/insula     |           | 31       | -5       | 14       | 11                 |
| L calcarine / cuneus | 18        | -0       | -75      | 17       | 11                 |
| L STG                | 41        | -53      | -37      | 14       | 9                  |
| R fusiform           | 37        | 28       | -58      | -11      | 8                  |
| L calcarine          | 17        | -14      | -68      | 10       | 5                  |
| R STG                | 41        | 52       | -37      | 10       | 4                  |
| L insula/putamen     | 13        | -35      | -5       | 3        | 3                  |
| R cuneus             | 18        | 17       | -75      | 31       | 3                  |
| L MTG                | 21        | -46      | -30      | 3        | 2                  |
| L cuneus             | 17        | -14      | -86      | 17       | 2                  |

| <b>PD</b>             | <b>BA</b> | <b>x</b> | <b>y</b> | <b>z</b> | <b># of voxels</b> |
|-----------------------|-----------|----------|----------|----------|--------------------|
| B/l preCG and SMA     | 4/6       | 28       | -33      | 59       | 1870               |
| R putamen             |           | 31       | 2        | 7        | 49                 |
| R MFG                 | 8         | 31       | 26       | 42       | 12                 |
| L putamen/insula      |           | -32      | -12      | 7        | 9                  |
| L insula              | 13        | -32      | 2        | 10       | 9                  |
| R temporal pole (STG) | 22        | 59       | 5        | 0        | 6                  |
| R STG                 | 22        | 56       | -12      | 0        | 4                  |
| R STG                 | 41        | 56       | -23      | 3        | 4                  |
| R STG                 | 22        | 59       | -26      | 3        | 3                  |
| R STG                 | 42        | 63       | -33      | 14       | 3                  |
| L Rolandic op         | 6         | -53      | 2        | 14       | 3                  |
| L mid occipital       |           | -42      | -72      | 17       | 2                  |
| L MFG                 | 9         | -32      | 33       | 38       | 2                  |

Top 5% of correlations are shown. Cutoff for HV is  $Z = 6.44$  and for patients  $Z = 5.79$ .

**Fig. 3**

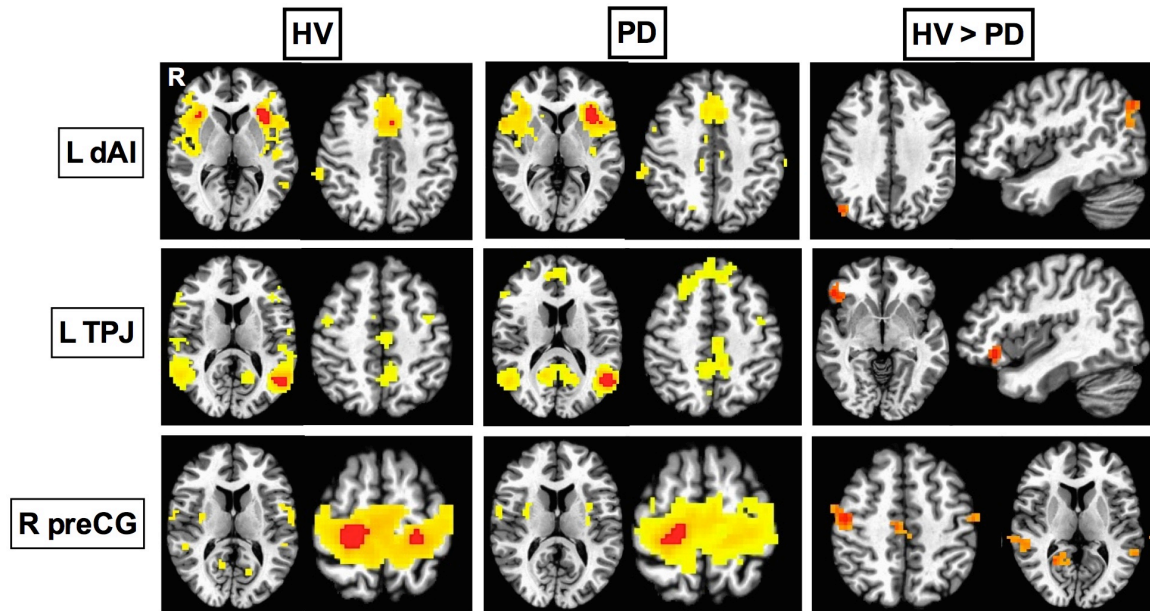

Axial and sagittal sections of within- and between-group seed-based whole-brain functional connectivity maps are shown. See corresponding tables for coordinates.

**Table 6. Correlations between the UPDRS total scores and average graph metrics across the whole network in the PD group**

| threshold | Degree |       | NS   |       | CC   |       | BC    |       | LE   |       |
|-----------|--------|-------|------|-------|------|-------|-------|-------|------|-------|
|           | r      | p     | r    | p     | r    | p     | r     | p     | r    | p     |
| 0.1       | 0.42   | 0.021 | 0.37 | 0.040 | 0.37 | 0.040 | -0.46 | 0.010 | -    | -     |
| 0.15      | 0.4    | 0.028 | 0.36 | 0.050 | 0.38 | 0.038 | -0.46 | 0.010 | 0.36 | 0.050 |
| 0.2       | 0.39   | 0.035 | -    | -     | 0.39 | 0.035 | -0.45 | 0.013 | 0.37 | 0.040 |
| 0.25      | 0.38   | 0.038 | -    | -     | 0.37 | 0.040 | -0.44 | 0.016 | -    | -     |
| 0.3       | 0.36   | 0.050 | -    | -     | 0.36 | 0.050 | -0.41 | 0.024 | 0.38 | 0.038 |
| 0.35      | -      | -     | -    | -     | 0.36 | 0.050 | -0.39 | 0.035 | 0.41 | 0.024 |
| 0.4       | -      | -     | -    | -     | -    | -     | -0.39 | 0.035 | 0.4  | 0.028 |

**Correlations between the UPDRS total scores and seed-based functional connectivity maps**

We used the significance threshold: voxel p value= 0.001, cluster size = 25 voxels, and kept the cluster size constant.

We found that the functional connectivity between the right preCG1 and left inferior frontal gyrus ( $x = -49, y = 47, z = 3$ ) showed a strong trend for positive correlation with the UPDRS total scores (voxel p value = 0.0012, cluster size = 25 voxels,  $Z = 4.28$ ).

As an exploratory analysis, we also correlated the UPDRS III motor exam scores with the seed-based functional connectivity maps using the same significance threshold: voxel p value= 0.001, cluster size = 25 voxels, and kept the cluster size constant. We observed the following results:

- There was a significant positive correlation between the UPDRS III scores and between the right preCG1 - right posterior insula ( $x = 42, y = -23, z = 3$ ) functional connectivity ( $Z = 4.64$ ).

The other two seeds demonstrated trends:

- The functional connectivity between the left dAI and left inferior temporal gyrus ( $x = -60, y = -58, z = -11$ ) showed positive correlation with the UPDRS III scores (voxel p value = 0.0035, cluster size = 25 voxels,  $Z = 4.16$ ).

- The functional connectivity between the left TPJ and left superior medial gyrus ( $x = -7, y = 33, z = 35$ ) showed positive correlation with the UPDRS III scores (voxel p value = 0.01, cluster size = 25 voxels,  $Z = 3.51$ ).

### **Whole-brain functional connectivity of the striatal-thalamic nodes**

There are two striatal and three thalamic nodes included in our composite network all of which belong to the CON. One may argue that the striatal-thalamic nodes were underrepresented in the network and therefore, did not yield between-group differences. As we pointed out in the Discussion, “More recent seed-based resting-state fMRI studies also showed abnormal striatal functional connectivity and striatal-cortical remapping in PD (Helmich et al. 2010; Wu et al. 2011b; Hacker et al. 2012; Luo et al. 2014).” In these studies (except for Wu et al., 2011), striatal connectivity was considered in a seed-based whole brain functional connectivity framework, i.e., outside the confines of a network topology. To examine this issue further, we performed an additional exploratory whole brain functional connectivity analysis using the striatal-thalamic nodes of the composite network as seeds. We used the significance threshold: voxel p value= 0.001, cluster size = 25 voxels, and kept the cluster size constant.

We found between-group differences. The striatal nodes showed stronger functional connectivity with the contralateral striatum in the HV > PD comparison. The reverse contrast did not reveal any differences. The functional connectivity of the thalamic nodes was not significantly different between the groups either.

**Table 7. Left striatum functional connectivity (coordinates: x = -20, y = 6, z = 7), cluster size always 25 voxels**

| <b>HV &gt; PD</b>          | <b>BA</b> | <b>x</b> | <b>y</b> | <b>z</b> | <b>Z</b> | <b>Voxel p value</b> |
|----------------------------|-----------|----------|----------|----------|----------|----------------------|
| R putamen                  |           | 21       | 9        | 3        | 4.08     | 0.001                |
| <u>Lower thresholds</u>    |           |          |          |          |          |                      |
| L putamen                  |           | -21      | 9        | 10       | 4.48     | 0.002                |
| R supramarginal gyrus      | 40        | 49       | -40      | 42       | 3.20     | 0.008                |
| R supplementary motor area | 6         | 14       | 19       | 45       | 3.30     | 0.01                 |

**Table 8. Right striatum functional connectivity (coordinates: x = 14, y = 6, z = 7), cluster size always 25 voxels**

| <b>HV &gt; PD</b>        | <b>BA</b> | <b>x</b> | <b>y</b> | <b>z</b> | <b>Z</b> | <b>Voxel p value</b> |
|--------------------------|-----------|----------|----------|----------|----------|----------------------|
| L caudate                |           | -18      | 12       | 14       | 4.86     | 0.001                |
| <u>Lower thresholds</u>  |           |          |          |          |          |                      |
| R caudate                |           | 17       | 9        | 17       | 3.65     | 0.003                |
| R superior frontal gyrus | 8         | 21       | 16       | 42       | 3.03     | 0.01                 |
